# Supplementary material for: Genetic regulation of OAS1 nonsense-mediated decay underlies association with COVID-19 hospitalization in patients of European and African ancestries
Source: PubMed Central journal article supplement (PMC9355882; doi:10.1038/s41588-022-01113-z), 2022-07-14

**Fig. 5c.** Unprocessed agarose gel image

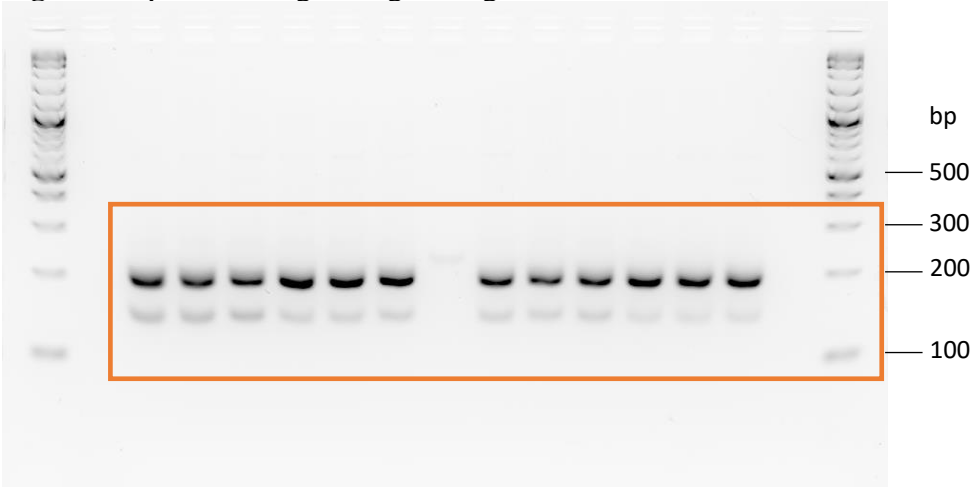

Supplement: 41588_2022_1113_MOESM6_ESM.pdf [file 41588_2022_1113_MOESM6_ESM.pdf]
